# Supplementary material for: SARS-CoV-2 Genomic Surveillance in Brazil: A Systematic Review with Scientometric Analysis
Source: Viruses. 2022 Dec 5;14(12):2715. doi: 10.3390/v14122715 (PMC9784312; doi:10.3390/v14122715)
Supplement: Supplementary file 1 [file viruses-14-02715-s001.zip › SupplementaryMaterial_S2.xlsx]

## Sheet: Table S1
Table S1: Dataset with the 106 selected studies.
author	Reference	title	Atual	type	inst_Pub_universities	inst_Public_labs	inst_Private	state_mg	state_rj	state_am	state_sp	state_pe	state_ro	state_se	state_rs	state_rn	state_ba	state_al	state_ce	state_sc	state_pa	state_pr	state_df	state_go	state_ma	state_mt	state_es	state_ms	state_pi	state_ac	state_ap	state_pb	state_to	state_rr	start_date	end_date	pub_date	desc_symptoms	desc_travel	desc_sewage	pcr_target_e	pcr_target_n	pcr_target_orf1ab	pcr_target_s	seq_platform_minion	seq_platform_miseq	seq_platform_other	sample_size	metrics
Adamoski 2021	Ref [40]	Large-Scale Screening of Asymptomatic Persons for SARS-CoV-2 Variants of Concern and Gamma Takeover, Brazil	0	Prevalence Study	present	present	absent	absent	absent	absent	absent	absent	absent	absent	absent	absent	absent	absent	absent	absent	absent	present	absent	absent	absent	absent	absent	absent	absent	absent	absent	absent	absent	absent	2020-10-10	2021-05-24	2021-09-17	Symptomatics & assymptomatics	Not mentioned	absent	present	present	present	absent	absent	absent	present	161	absent
Adamoski 2022	Ref [70]	SARS-CoV-2 Delta and Omicron Variants Surge in Curitiba, Southern Brazil, and Its Impact on Overall COVID-19 Lethality	1	Prevalence Study	present	present	absent	absent	absent	absent	absent	absent	absent	absent	absent	absent	absent	absent	absent	absent	absent	present	absent	absent	absent	absent	absent	absent	absent	absent	absent	absent	absent	absent	2020-06-29	2022-01-31	2022-04-14	Symptomatics & assymptomatics	Not mentioned	absent	present	present	present	absent	absent	absent	present	1118	absent
Amorim 2021	Ref [110]	Respiratory Viral Shedding in Healthcare Workers Reinfected with SARS-CoV-2, Brazil, 2020	0	Case Report	present	present	present	absent	absent	absent	present	absent	absent	absent	absent	absent	absent	absent	absent	absent	absent	absent	absent	absent	absent	absent	absent	absent	absent	absent	absent	absent	absent	absent	2020-04-05	2020-05-10	2021-04-19	Symptomatics	Not mentioned	absent	present	absent	absent	absent	present	absent	absent	4	present
Arantes 2021	Ref [98]	Multiple Introductions of SARS-CoV-2 C.37 Lambda lineage in the Southern Brazilian region	0	Case Report	absent	present	absent	absent	absent	absent	absent	absent	absent	absent	present	absent	absent	absent	absent	absent	absent	absent	absent	absent	absent	absent	absent	absent	absent	absent	absent	absent	absent	absent	2021-06-01	2021-06-05	2021-09-27	Not mentioned	Patients with and without travel hist.	absent	absent	absent	absent	absent	absent	present	absent	2	absent
Arantes 2022	Ref [71]	Emergence and Spread of the SARS-CoV-2 Variant of Concern Delta across Different Brazilian Regions	1	Prevalence Study	present	present	absent	present	present	present	present	present	absent	absent	present	present	present	present	present	present	present	present	absent	present	present	present	present	absent	present	absent	present	present	present	absent	2021-04-26	2021-08-24	2022-07-10	Not mentioned	Not mentioned	absent	absent	absent	absent	absent	absent	absent	absent	482	absent
Araujo 2020	Ref [4]	SARS-CoV-2 isolation from the first reported patients in Brazil and establishment of a coordinated task network	0	Case Report	present	present	present	absent	absent	absent	present	absent	absent	absent	absent	absent	absent	absent	absent	absent	absent	absent	absent	absent	absent	absent	absent	absent	absent	absent	absent	absent	absent	absent	2020-02-28	2020-02-28	2020-09-24	Symptomatics	Travel hist. present	absent	present	absent	absent	absent	absent	absent	present	2	absent
Banho 2022	Ref [72]	Impact of SARS-CoV-2 Gamma lineage introduction and COVID-19 vaccination on the epidemiological landscape of a Brazilian city	1	Prevalence Study	present	present	present	absent	absent	absent	present	absent	absent	absent	absent	absent	absent	absent	absent	absent	absent	absent	absent	absent	absent	absent	absent	absent	absent	absent	absent	absent	absent	absent	2020-10-03	2021-06-29	2022-04-13	Symptomatics & assymptomatics	Not mentioned	absent	present	present	absent	absent	absent	present	absent	305	absent
Bittar 2021	Ref [41]	The Emergence of the New P.4 Lineage of SARS-CoV-2 With Spike L452R Mutation in Brazil	0	Prevalence Study	present	present	absent	absent	absent	absent	present	absent	absent	absent	absent	absent	absent	absent	absent	absent	absent	absent	absent	absent	absent	absent	absent	absent	absent	absent	absent	absent	absent	absent	2021-01-01	2021-06-30	2021-10-01	Not mentioned	Not mentioned	absent	absent	absent	absent	absent	absent	present	present	439	absent
Botelho-Souza 2021	Ref [54]	SARS-CoV-2 genomic surveillance in Rondonia, Brazilian Western Amazon	0	Prevalence Study	present	present	absent	absent	absent	absent	absent	absent	present	absent	absent	absent	absent	absent	absent	absent	absent	absent	absent	absent	absent	absent	absent	absent	absent	absent	absent	absent	absent	absent	2020-05-05	2020-06-05	2021-02-12	Not mentioned	Not mentioned	absent	absent	present	absent	absent	absent	present	absent	8	present
Cabral 2021	Ref [55]	Use of Sanger protocols to identify variants of concern, key mutations and track evolution of SARS-CoV-2	0	Prevalence Study	absent	present	absent	absent	absent	absent	present	absent	absent	absent	absent	absent	absent	absent	absent	absent	absent	absent	absent	absent	absent	absent	absent	absent	absent	absent	absent	absent	absent	absent	NA	2021-02-28	2021-12-13	Not mentioned	Not mentioned	absent	present	present	present	absent	absent	absent	present	95	absent
Camargo 2021	Ref [114]	SARS-CoV-2 reinfection in a healthcare professional in inner Sao Paulo during the first wave of COVID-19 in Brazil	0	Case Report	absent	present	present	absent	absent	absent	present	absent	absent	absent	absent	absent	absent	absent	absent	absent	absent	absent	absent	absent	absent	absent	absent	absent	absent	absent	absent	absent	absent	absent	2020-06-29	2020-11-21	2021-08-20	Symptomatics	Not mentioned	absent	present	present	present	absent	absent	absent	present	2	present
Campos 2021	Ref [38]	SARS-CoV-2 variants in severely symptomatic and deceased persons who had been vaccinated against COVID-19 in Sao Paulo, Brazil	0	Prevalence Study	absent	present	absent	absent	absent	absent	present	absent	absent	absent	absent	absent	absent	absent	absent	absent	absent	absent	absent	absent	absent	absent	absent	absent	absent	absent	absent	absent	absent	absent	NA	NA	2021-08-11	Symptomatics	Not mentioned	absent	absent	absent	absent	absent	absent	absent	present	20	absent
Candido 2020	Ref [20]	Evolution and epidemic spread of SARS-CoV-2 in Brazil	0	Prevalence Study	present	present	present	present	present	present	present	present	absent	present	present	present	present	present	present	present	present	present	present	present	present	present	present	present	present	absent	absent	absent	absent	absent	2020-03-05	2020-04-30	2020-09-04	Symptomatics	Not mentioned	absent	present	absent	absent	absent	present	absent	absent	427	present
Carlos 2021	Ref [93]	First genome sequencing of SARS-CoV-2 recovered from an infected cat and its owner in Latin America	0	Case Report	present	absent	absent	absent	absent	absent	absent	absent	absent	absent	absent	absent	present	absent	absent	absent	absent	absent	absent	absent	absent	absent	absent	absent	absent	absent	absent	absent	absent	absent	NA	NA	2021-01-05	Symptomatics	Not mentioned	absent	present	absent	absent	absent	absent	absent	present	3	present
Claro 2021	Ref [123]	Local Transmission of SARS-CoV-2 Lineage B.1.1.7, Brazil, December 2020	0	Case Report	present	absent	present	absent	absent	absent	present	absent	absent	absent	absent	absent	absent	absent	absent	absent	absent	absent	absent	absent	absent	absent	absent	absent	absent	absent	absent	absent	absent	absent	2020-12-30	2020-12-30	2021-01-25	Symptomatics & assymptomatics	Patients with and without travel hist.	absent	absent	present	present	present	present	absent	absent	2	present
Cunha 2021	Ref [99]	Atypical Prolonged Viral Shedding With Intra-Host SARS-CoV-2 Evolution in a Mildly Affected Symptomatic Patient	0	Case Report	present	present	absent	absent	absent	absent	present	absent	absent	absent	absent	absent	absent	absent	absent	absent	absent	absent	absent	absent	absent	absent	absent	absent	absent	absent	absent	absent	absent	absent	2020-04-27	2020-12-01	2021-11-26	Symptomatics	Not mentioned	absent	present	absent	present	absent	absent	present	absent	3	absent
da Silva 2021_1	Ref [121]	Early detection of SARS-CoV-2 P.1 variant in Southern Brazil and reinfection of the same patient by P.2	0	Case Report	absent	present	present	absent	absent	absent	absent	absent	absent	absent	present	absent	absent	absent	absent	absent	absent	absent	absent	absent	absent	absent	absent	absent	absent	absent	absent	absent	absent	absent	2020-11-30	2021-03-11	2021-06-23	Not mentioned	Not mentioned	absent	present	absent	absent	absent	absent	present	absent	2	present
da Silva 2021_2	Ref [112]	New Brazilian variant of the SARS-CoV-2 (P1/Gamma) of COVID-19 in Alagoas state	0	Case Report	present	present	present	absent	absent	absent	absent	absent	absent	absent	absent	absent	absent	present	absent	absent	absent	absent	absent	absent	absent	absent	absent	absent	absent	absent	absent	absent	absent	absent	2021-02-16	2021-02-16	2021-05-19	Symptomatics	Patients with and without travel hist.	absent	absent	present	absent	absent	absent	absent	absent	2	absent
da Silva 2022	Ref [53]	Cluster of SARS-CoV-2 Gamma Variant Infections, Parintins, Brazil, March 2021	0	Prevalence Study	absent	present	absent	absent	absent	present	absent	absent	absent	absent	absent	absent	absent	absent	absent	absent	absent	absent	absent	absent	absent	absent	absent	absent	absent	absent	absent	absent	absent	absent	2021-03-04	2021-03-05	2021-12-02	Not mentioned	Not mentioned	absent	present	present	present	absent	absent	present	absent	45	absent
da Silva 2022_2	Ref [73]	Brief dispersion of a putative B.1.1.28-derived SARS-CoV-2 lineage harboring additional N234P and E471Q spike protein mutations in individuals crossing the Argentina-Brazil border	1	Prevalence Study	present	present	present	absent	absent	absent	absent	absent	absent	absent	present	absent	absent	absent	absent	absent	absent	absent	absent	absent	absent	absent	absent	absent	absent	absent	absent	absent	absent	absent	2021-04-30	2021-06-15	2022-06-23	Symptomatics & assymptomatics	Travel hist. present	absent	absent	absent	absent	absent	absent	present	absent	26	absent
da Silva 2022_3	Ref [74]	Genomic and epidemiologic surveillance of SARS-CoV-2 in Southern Brazil and identification of a new Omicron-L452R sublineage	1	Prevalence Study	present	present	present	absent	absent	absent	absent	absent	absent	absent	present	absent	absent	absent	absent	absent	absent	absent	absent	absent	absent	absent	absent	absent	absent	absent	absent	absent	absent	absent	2021-11-30	2022-03-15	2022-08-30	Symptomatics	Not mentioned	absent	absent	absent	absent	absent	absent	present	absent	152	absent
de Oliveira	Ref [104]	SARS-CoV-2 BA.1 and BA.2 coinfection detected by genomic surveillance in Brazil, January 2022	1	Case Report	present	absent	present	absent	present	absent	absent	absent	absent	absent	absent	absent	absent	absent	absent	absent	absent	absent	absent	absent	absent	absent	absent	absent	absent	absent	absent	absent	absent	absent	2022-01-17	2022-01-25	2022-07-16	Symptomatics	Not mentioned	absent	absent	present	present	present	absent	absent	present	1	present
de Siqueira 2021	Ref [111]	Early detection of P.1 variant of SARS-CoV-2 in a cluster of cases in Salvador, Brazil	0	Case Report	present	present	present	absent	absent	absent	absent	absent	absent	absent	absent	absent	present	absent	absent	absent	absent	absent	absent	absent	absent	absent	absent	absent	absent	absent	absent	absent	absent	absent	2020-12-23	2020-12-27	2021-05-07	Symptomatics	Not mentioned	absent	present	present	present	absent	absent	absent	present	3	absent
de Souza 2021	Ref [47]	Clusters of SARS-CoV-2 Lineage B.1.1.7 Infection after Vaccination with Adenovirus-Vectored and Inactivated Vaccines	0	Prevalence Study	present	absent	present	absent	absent	absent	present	absent	absent	absent	absent	absent	absent	absent	absent	absent	absent	absent	absent	absent	absent	absent	absent	absent	absent	absent	absent	absent	absent	absent	2021-03-24	2021-03-29	2021-10-22	Symptomatics & assymptomatics	Not mentioned	absent	present	absent	absent	absent	present	absent	absent	9	present
de Souza 2022	Ref [69]	Genomic Epidemiology of SARS-CoV-2 in Tocantins State and the Diffusion of P.1.7 and AY.99.2 Lineages in Brazil	1	Prevalence Study	present	present	present	absent	absent	absent	absent	absent	absent	absent	absent	absent	absent	absent	absent	absent	absent	absent	absent	absent	absent	absent	absent	absent	absent	absent	absent	absent	present	absent	2020-12-21	2021-12-16	2022-03-23	Symptomatics	Not mentioned	absent	present	present	present	absent	present	absent	absent	241	absent
Demoliner 2021	Ref [49]	Predominance of SARS-CoV-2 P.1 (Gamma) lineage inducing the recent COVID-19 wave in southern Brazil and the finding of an additional S: D614A mutation	0	Prevalence Study	absent	absent	present	absent	absent	absent	absent	absent	absent	absent	present	absent	absent	absent	absent	absent	absent	absent	absent	absent	absent	absent	absent	absent	absent	absent	absent	absent	absent	absent	2021-01-28	2021-04-23	2021-11-09	Not mentioned	Not mentioned	absent	absent	absent	absent	absent	absent	present	absent	70	present
Dezordi 2022	Ref [75]	Unusual SARS- CoV-2 intrahost diversity reveals lineage superinfection	1	Prevalence Study	absent	present	absent	absent	absent	present	absent	absent	absent	absent	present	absent	present	absent	present	present	absent	absent	absent	absent	absent	absent	present	absent	absent	absent	absent	absent	absent	absent	2020-05-18	2021-04-30	2022-03-17	Symptomatics	Not mentioned	absent	absent	absent	absent	absent	absent	absent	absent	1150	present
Dorlass 2021	Ref [48]	Survey of SARS-CoV-2 genetic diversity in two major Brazilian cities using a fast and affordable Sanger sequencing strategy	0	Prevalence Study	present	present	present	present	absent	absent	present	absent	absent	absent	absent	absent	absent	absent	absent	absent	absent	absent	absent	absent	absent	absent	absent	absent	absent	absent	absent	absent	absent	absent	2020-03-01	2021-04-30	2021-10-28	Not mentioned	Not mentioned	absent	present	absent	absent	absent	absent	absent	present	228	absent
dos Santos 2021_1	Ref [23]	SARS-CoV-2 genomic surveillance in Northeast Brazil: timing of emergence of the Brazilian variant of concern P1	0	Prevalence Study	present	present	absent	absent	absent	absent	absent	absent	absent	present	absent	absent	absent	absent	absent	absent	absent	absent	absent	absent	absent	absent	absent	absent	absent	absent	absent	absent	absent	absent	2020-03-14	2021-02-25	2021-04-20	Not mentioned	Not mentioned	absent	absent	absent	absent	absent	present	absent	absent	147	absent
dos Santos 2021_2	Ref [117]	Recurrent COVID-19 including evidence of reinfection and enhanced severity in thirty Brazilian healthcare workers	0	Case Report	present	present	absent	absent	absent	absent	absent	absent	absent	present	absent	absent	absent	absent	absent	absent	absent	absent	absent	absent	absent	absent	absent	absent	absent	absent	absent	absent	absent	absent	2020-06-13	2020-07-30	2021-02-13	Not mentioned	Not mentioned	absent	absent	present	present	absent	absent	absent	present	3	present
dos Santos 2021_3	Ref [107]	First Report of SARS-CoV-2 B.1.1.251 lineage in Brazil	0	Case Report	present	present	absent	absent	absent	absent	absent	absent	absent	present	absent	absent	absent	absent	absent	absent	absent	absent	absent	absent	absent	absent	absent	absent	absent	absent	absent	absent	absent	absent	2021-01-29	2021-01-29	2021-02-24	Symptomatics	Travel hist. absent	absent	absent	absent	absent	absent	present	absent	absent	1	absent
Estofolete 2021	Ref [122]	Case Study of Two Post Vaccination SARS-CoV-2 Infections with P1 Variants in CoronaVac Vaccinees in Brazil	0	Case Report	present	present	absent	absent	absent	absent	present	absent	absent	absent	absent	absent	absent	absent	absent	absent	absent	absent	absent	absent	absent	absent	absent	absent	absent	absent	absent	absent	absent	absent	2020-07-21	2020-12-16	2021-06-26	Symptomatics	Patients with and without travel hist.	absent	present	present	absent	absent	absent	present	present	2	absent
Faria 2021	Ref [22]	Genomics and epidemiology of the P.1 SARS-CoV-2 lineage in Manaus, Brazil	0	Prevalence Study	present	present	absent	absent	absent	present	absent	absent	absent	absent	absent	absent	absent	absent	absent	absent	absent	absent	absent	absent	absent	absent	absent	absent	absent	absent	absent	absent	absent	absent	2020-11-01	2021-01-09	2021-04-14	Not mentioned	Not mentioned	absent	present	present	present	absent	present	absent	absent	189	present
Fernandez 2022	Ref [102]	Case Report: SARS-CoV-2 Gamma Isolation From Placenta of a Miscarriage in Midwest, Brazil	1	Case Report	present	present	absent	absent	absent	absent	absent	absent	absent	absent	absent	absent	absent	absent	absent	absent	absent	absent	absent	absent	absent	absent	absent	present	absent	absent	absent	absent	absent	absent	2022-02-25	2022-02-25	2022-03-04	Symptomatics	Not mentioned	absent	present	present	present	absent	absent	absent	absent	1	absent
Ferreira 2022	Ref [100]	Clinical and genomic data of sars-cov-2 detected in maternal-fetal interface during the first wave of infection in Brazil	0	Case Report	present	absent	absent	absent	absent	absent	absent	absent	absent	absent	absent	absent	absent	absent	absent	absent	absent	absent	absent	absent	absent	present	absent	absent	absent	absent	absent	absent	absent	absent	2020-06-01	2020-07-31	2022-01-26	Symptomatics	Not mentioned	absent	absent	present	present	present	absent	present	absent	2	absent
Ferreira 2022_2	Ref [77]	Impact of SARS-CoV-2 Gamma lineage introduction and COVID-19 vaccination on the epidemiological landscape of a Brazilian city	1	Prevalence Study	present	absent	present	present	absent	absent	absent	absent	absent	absent	absent	absent	absent	absent	absent	absent	absent	absent	absent	absent	absent	absent	absent	absent	absent	absent	absent	absent	absent	absent	2020-03-25	2020-05-25	2022-09-02	Symptomatics	Not mentioned	absent	absent	absent	absent	absent	present	absent	absent	20	present
Fintelman-Rodrigues 2021	Ref [108]	Genetic Evidence and Host Immune Response in Persons Reinfected with SARS-CoV-2, Brazil	0	Case Report	present	present	absent	absent	present	absent	absent	absent	absent	absent	absent	absent	absent	absent	absent	absent	absent	absent	absent	absent	absent	absent	absent	absent	absent	absent	absent	absent	absent	absent	2020-03-01	2020-12-31	2021-04-01	Not mentioned	Not mentioned	absent	absent	present	absent	absent	absent	absent	present	2	present
Fongaro 2021	Ref [91]	The presence of SARS-CoV-2 RNA in human sewage in Santa Catarina, Brazil, November 2019	0	Prevalence Study	present	absent	present	absent	absent	absent	absent	absent	absent	absent	absent	absent	absent	absent	absent	present	absent	absent	absent	absent	absent	absent	absent	absent	absent	absent	absent	absent	absent	absent	2019-10-30	2020-03-04	2021-03-08	Not mentioned	Not mentioned	present	present	present	present	present	absent	present	absent	4	absent
Fonseca 2021	Ref [120]	Genomic evidence of SARS-CoV-2 reinfection case with the emerging B.1.2 variant in Brazil	0	Case Report	present	present	absent	present	absent	absent	absent	absent	absent	absent	absent	absent	absent	absent	absent	absent	absent	absent	absent	absent	absent	absent	absent	absent	absent	absent	absent	absent	absent	absent	2020-05-21	2021-01-06	2021-05-28	Not mentioned	Not mentioned	absent	absent	present	absent	absent	absent	absent	present	2	present
Fonseca 2022	Ref [78]	Tracking the turnover of SARS-CoV-2 VOCs Gamma to Delta in a Brazilian state (Minas Gerais) with a high-vaccination status	1	Prevalence Study	present	present	present	present	absent	absent	absent	absent	absent	absent	absent	absent	absent	absent	absent	absent	absent	absent	absent	absent	absent	absent	absent	absent	absent	absent	absent	absent	absent	absent	2021-06-20	2021-10-09	2022-07-27	Symptomatics	Not mentioned	absent	absent	present	present	present	absent	present	present	2389	present
Franceschi 2021_1	Ref [27]	Genomic epidemiology of SARS-CoV-2 in Esteio, Rio Grande do Sul, Brazil	0	Prevalence Study	present	absent	absent	absent	absent	absent	absent	absent	absent	absent	present	absent	absent	absent	absent	absent	absent	absent	absent	absent	absent	absent	absent	absent	absent	absent	absent	absent	absent	absent	2020-04-30	2020-10-13	2021-05-20	Symptomatics	Not mentioned	absent	present	present	absent	absent	absent	present	absent	21	present
Franceschi 2021_2	Ref [37]	Predominance of the SARS-CoV-2 Lineage P.1 and Its Sublineage P.1.2 in Patients from the Metropolitan Region of Porto Alegre, Southern Brazil in March 2021	0	Prevalence Study	present	present	present	absent	absent	absent	absent	absent	absent	absent	present	absent	absent	absent	absent	absent	absent	absent	absent	absent	absent	absent	absent	absent	absent	absent	absent	absent	absent	absent	2021-03-09	2021-03-17	2021-08-05	Symptomatics	Not mentioned	absent	absent	present	absent	absent	absent	present	absent	56	present
Francisco Jr 2021_1	Ref [87]	Pervasive transmission of E484K and emergence of VUI-NP13L with evidence of SARS-CoV-2 co-infection events by two different lineages in Rio Grande do Sul, Brazil	0	Prevalence Study	present	present	absent	absent	absent	absent	absent	absent	absent	absent	present	absent	absent	absent	absent	absent	absent	absent	absent	absent	absent	absent	absent	absent	absent	absent	absent	absent	absent	absent	2020-11-23	2020-11-30	2021-02-22	Symptomatics & assymptomatics	Not mentioned	absent	present	present	absent	absent	absent	present	absent	92	present
Francisco Jr 2021_2	Ref [44]	Turnover of SARS-CoV-2 Lineages Shaped the Pandemic and Enabled the Emergence of New Variants in the State of Rio de Janeiro, Brazil	0	Prevalence Study	present	present	absent	absent	present	absent	absent	absent	absent	absent	absent	absent	absent	absent	absent	absent	absent	absent	absent	absent	absent	absent	absent	absent	absent	absent	absent	absent	absent	absent	2021-03-24	2021-06-06	2021-10-07	Not mentioned	Not mentioned	absent	absent	absent	absent	absent	absent	present	absent	1927	absent
Freire-neto 2022	Ref [79]	SARS-CoV-2 reinfections with BA.1 (Omicron) variant among fully vaccinated individuals in northeastern Brazil	1	Prevalence Study	present	present	present	absent	absent	absent	absent	absent	absent	absent	absent	present	absent	absent	absent	absent	absent	absent	absent	absent	absent	absent	absent	absent	absent	absent	absent	absent	absent	absent	2020-06-01	2022-02-28	2022-10-03	Symptomatics	Not mentioned	absent	absent	present	absent	absent	absent	absent	present	18	absent
Gesto 2022	Ref [80]	Implemented occupational health surveillance limits the spread of SARS-CoV-2 Omicron at the workplace	1	Prevalence Study	absent	present	present	absent	present	absent	absent	absent	absent	absent	absent	absent	absent	absent	absent	absent	absent	absent	absent	absent	absent	absent	absent	absent	absent	absent	absent	absent	absent	absent	2021-12-31	2022-01-15	2022-08-30	Symptomatics & assymptomatics	Not mentioned	absent	absent	present	absent	absent	absent	absent	present	95	absent
Giovanetti 2022	Ref [81]	Genomic epidemiology of the SARS-CoV-2 epidemic in Brazil	1	Prevalence Study	present	present	present	present	absent	absent	present	absent	absent	absent	present	absent	present	absent	absent	absent	absent	present	absent	absent	absent	present	absent	present	absent	absent	absent	absent	absent	absent	2020-02-01	2021-06-30	2022-08-18	Symptomatics	Not mentioned	absent	present	present	present	absent	present	present	absent	3866	present
Goes 2021	Ref [113]	New infections by SARS-CoV-2 variants of concern after natural infections and post-vaccination in Rio de Janeiro, Brazil	0	Case Report	present	present	absent	absent	present	absent	absent	absent	absent	absent	absent	absent	absent	absent	absent	absent	absent	absent	absent	absent	absent	absent	absent	absent	absent	absent	absent	absent	absent	absent	2021-01-15	2021-03-31	2021-07-10	Not mentioned	Not mentioned	absent	absent	present	absent	absent	absent	absent	present	72	absent
Graf 2021	Ref [56]	Identification of a novel SARS-CoV-2 P.1 sub-lineage in Brazil provides new insights about the mechanisms of emergence of variants of concern	0	Prevalence Study	present	present	absent	present	present	present	absent	absent	absent	absent	present	absent	absent	present	absent	present	absent	present	absent	absent	absent	absent	present	absent	absent	absent	absent	absent	absent	absent	2020-08-01	2021-03-31	2021-12-15	Not mentioned	Not mentioned	absent	absent	absent	absent	absent	absent	present	absent	688	absent
Gräf 2022	Ref [82]	Phylogenetic-based inference reveals distinct transmission dynamics of SARS-CoV-2 lineages Gamma and P.2 in Brazil	1	Prevalence Study	present	present	present	present	present	present	present	present	present	present	present	present	present	present	present	present	present	present	present	present	present	present	present	present	present	present	present	present	present	present	2020-09-01	2021-04-30	2022-04-15	Symptomatics	Not mentioned	absent	present	present	present	absent	absent	present	absent	5472	present
Gularte 2021	Ref [97]	Reinfection cases by closely related SARS-CoV-2 lineages in Southern Brazil	0	Case Report	absent	present	absent	absent	absent	absent	absent	absent	absent	absent	present	absent	absent	absent	absent	absent	absent	absent	absent	absent	absent	absent	absent	absent	absent	absent	absent	absent	absent	absent	2020-07-01	2020-09-30	2021-09-25	Symptomatics	Patients with and without travel hist.	absent	present	absent	absent	absent	absent	present	absent	4	absent
Gularte 2022	Ref [58]	Early introduction, dispersal and evolution of Delta SARS-CoV-2 in Southern Brazil, late predominance of AY.99.2 and AY.101 related lineages	0	Prevalence Study	absent	present	present	absent	absent	absent	absent	absent	absent	absent	present	absent	absent	absent	absent	absent	absent	absent	absent	absent	absent	absent	absent	absent	absent	absent	absent	absent	absent	absent	2021-06-01	2021-10-31	2022-01-29	Symptomatics	Patients with and without travel hist.	absent	absent	absent	absent	absent	absent	present	absent	183	present
Gularte 2022_2	Ref [103]	Viral isolation allows characterization of early samples of SARS-CoV-2 lineage B1.1.33 with unique mutations (S: H655Y and T63N) circulating in Southern Brazil in 2020	1	Case Report	present	absent	present	absent	absent	absent	absent	absent	absent	absent	present	absent	absent	absent	absent	absent	absent	absent	absent	absent	absent	absent	absent	absent	absent	absent	absent	absent	absent	absent	2020-04-07	2020-07-23	2022-07-01	Not mentioned	Not mentioned	absent	present	absent	absent	absent	absent	present	absent	4	absent
Henriques-Santos 2022	Ref [66]	SARS-CoV-2 Variant Determination Through SNP Assays in Samples From Industry Workers From Rio de Janeiro, Brazil	1	Prevalence Study	present	absent	present	absent	present	absent	absent	absent	absent	absent	absent	absent	absent	absent	absent	absent	absent	absent	absent	absent	absent	absent	absent	absent	absent	absent	absent	absent	absent	absent	2020-09-01	2021-05-31	2022-02-09	Assymptomatics	Not mentioned	absent	absent	present	absent	absent	absent	absent	absent	351	absent
Kashima 2021	Ref [45]	Introduction of SARS-CoV-2 C.37 (WHO VOI lambda) in the Sao Paulo State, Southeast Brazil	0	Prevalence Study	present	present	present	absent	absent	absent	present	absent	absent	absent	absent	absent	absent	absent	absent	absent	absent	absent	absent	absent	absent	absent	absent	absent	absent	absent	absent	absent	absent	absent	2021-02-21	2021-08-07	2021-10-12	Not mentioned	Not mentioned	absent	present	present	present	absent	absent	present	absent	7	present
Kuriyama 2022	Ref [64]	SARS-CoV-2 Molecular Epidemiology Can Be Enhanced by Occupational Health: The Experience of Monitoring Variants of Concern in Workplaces in Rio de Janeiro, Brazil	1	Prevalence Study	present	present	present	absent	present	absent	absent	absent	absent	absent	absent	absent	absent	absent	absent	absent	absent	absent	absent	absent	absent	absent	absent	absent	absent	absent	absent	absent	absent	absent	2021-05-01	2021-08-31	2022-04-29	Not mentioned	Not mentioned	absent	absent	present	absent	absent	absent	absent	present	50	absent
Lamarca 2021_1	Ref [101]	Genomic Surveillance Tracks the First Community Outbreak of the SARS-CoV-2 Delta (B.1.617.2) Variant in Brazil	0	Case Report	present	present	absent	absent	present	absent	absent	absent	absent	absent	absent	absent	absent	absent	absent	absent	absent	absent	absent	absent	absent	absent	absent	absent	absent	absent	absent	absent	absent	absent	2021-06-16	2021-06-17	2022-01-26	Symptomatics	Travel hist. absent	absent	absent	absent	absent	absent	absent	absent	absent	63	absent
Lamarca 2021_2	Ref [46]	Genomic surveillance of SARS-CoV-2 tracks early interstate transmission of P.1 lineage and diversification within P.2 clade in Brazil	0	Prevalence Study	present	present	absent	absent	present	present	absent	absent	absent	absent	absent	present	present	absent	absent	absent	absent	absent	absent	absent	absent	absent	absent	absent	absent	absent	absent	present	absent	absent	2020-12-01	2021-02-15	2021-10-13	Not mentioned	Not mentioned	absent	present	present	present	absent	absent	present	absent	185	absent
Lamarca 2022	Ref [83]	Phylodynamic analysis of SARS-CoV-2 spread in Rio de Janeiro, Brazil, highlights how metropolitan areas act as dispersal hubs for new variants	1	Prevalence Study	present	present	absent	absent	present	absent	absent	absent	absent	absent	absent	absent	absent	absent	absent	absent	absent	absent	absent	absent	absent	absent	absent	absent	absent	absent	absent	absent	absent	absent	2021-06-01	2021-09-12	2022-09-15	Symptomatics	Not mentioned	absent	absent	absent	absent	absent	absent	absent	present	2574	absent
Lima 2022	Ref [62]	SARS-COV-2 genomic monitoring in the state of Sao Paulo unveils two emerging AY.43 sublineages	0	Prevalence Study	present	present	absent	absent	absent	absent	present	absent	absent	absent	absent	absent	absent	absent	absent	absent	absent	absent	absent	absent	absent	absent	absent	absent	absent	absent	absent	absent	absent	absent	2021-10-08	2021-10-30	2022-03-01	Not mentioned	Not mentioned	absent	present	present	present	absent	absent	present	absent	352	absent
Martins 2021	Ref [92]	Detection of SARS-CoV-2 lineage P.1 in patients from a region with exponentially increasing hospitalisation rate, February 2021, Rio Grande do Sul, Southern Brazil	0	Prevalence Study	present	present	absent	absent	absent	absent	absent	absent	absent	absent	present	absent	absent	absent	absent	absent	absent	absent	absent	absent	absent	absent	absent	absent	absent	absent	absent	absent	absent	absent	2021-01-01	2021-02-28	2021-03-25	Not mentioned	Not mentioned	absent	absent	present	absent	absent	absent	present	absent	68	present
Miguita 2022	Ref [90]	Biosafety in Dental Health Care During the COVID-19 Pandemic: A Longitudinal Study	1	Prevalence Study	present	absent	absent	present	absent	absent	absent	absent	absent	absent	absent	absent	absent	absent	absent	absent	absent	absent	absent	absent	absent	absent	absent	absent	absent	absent	absent	absent	absent	absent	2021-01-11	2021-03-12	2022-05-10	Symptomatics & assymptomatics	Patients with and without travel hist.	absent	absent	present	absent	absent	absent	present	absent	2	1
Mir 2021	Ref [30]	Recurrent Dissemination of SARS-CoV-2 Through the Uruguayan-Brazilian Border	0	Prevalence Study	present	present	present	absent	absent	absent	absent	absent	absent	absent	present	absent	absent	absent	absent	absent	absent	absent	absent	absent	absent	absent	absent	absent	absent	absent	absent	absent	absent	absent	2020-03-09	2020-08-16	2021-05-28	Symptomatics & assymptomatics	Travel hist. present	absent	present	absent	present	absent	present	present	present	68	absent
Moreira 2021_1	Ref [29]	Epidemic Spread of SARS-CoV-2 Lineage B.1.1.7 in Brazil	0	Prevalence Study	present	present	present	present	present	absent	present	absent	absent	present	absent	absent	present	absent	absent	absent	absent	present	absent	absent	absent	present	present	absent	absent	absent	absent	absent	absent	absent	2021-01-04	2021-01-24	2021-05-26	Not mentioned	Not mentioned	absent	absent	present	absent	present	absent	present	absent	25	present
Moreira 2021_2	Ref [42]	Epidemiological dynamics of SARS-CoV-2 VOC Gamma in Rio de Janeiro, Brazil	0	Prevalence Study	present	absent	present	absent	present	absent	absent	absent	absent	absent	absent	absent	absent	absent	absent	absent	absent	absent	absent	absent	absent	absent	absent	absent	absent	absent	absent	absent	absent	absent	2020-12-11	2021-05-05	2021-10-01	Not mentioned	Not mentioned	absent	absent	present	absent	absent	absent	present	absent	278	present
Nascimento 2020	Ref [94]	Genomic and phylogenetic characterisation of an imported case of SARS-CoV-2 in Amazonas State, Brazil	0	Case Report	present	present	absent	absent	absent	present	absent	absent	absent	absent	absent	absent	absent	absent	absent	absent	absent	absent	absent	absent	absent	absent	absent	absent	absent	absent	absent	absent	absent	absent	2020-03-15	2020-03-15	2020-08-25	Assymptomatics	Travel hist. present	absent	absent	present	absent	absent	absent	present	absent	1	present
Naveca 2021	Ref [28]	COVID-19 in Amazonas, Brazil, was driven by the persistence of endemic lineages and P.1 emergence	0	Prevalence Study	present	present	absent	absent	absent	present	absent	absent	absent	absent	absent	absent	absent	absent	absent	absent	absent	absent	absent	absent	absent	absent	absent	absent	absent	absent	absent	absent	absent	absent	2020-11-01	2021-01-31	2021-05-25	Not mentioned	Not mentioned	absent	present	present	present	absent	absent	present	absent	644	present
Naveca 2022	Ref [61]	Spread of Gamma (P.1) Sub-Lineages Carrying Spike Mutations Close to the Furin Cleavage Site and Deletions in the N-Terminal Domain Drives Ongoing Transmission of SARS-CoV-2 in Amazonas, Brazil	0	Prevalence Study	present	present	present	absent	absent	present	absent	absent	absent	absent	absent	absent	absent	absent	absent	absent	absent	absent	absent	absent	absent	absent	absent	absent	absent	absent	absent	absent	absent	absent	2021-01-01	2021-07-06	2022-02-23	Not mentioned	Not mentioned	absent	absent	absent	absent	absent	absent	present	absent	1188	present
Nicolete 2021	Ref [26]	Interacting Epidemics in Amazonian Brazil: Prior Dengue Infection Associated With Increased Coronavirus Disease 2019 (COVID-19) Risk in a Population-Based Cohort Study	0	Prevalence Study	present	absent	absent	absent	absent	absent	absent	absent	absent	absent	absent	absent	absent	absent	absent	absent	absent	absent	absent	absent	absent	absent	absent	absent	absent	present	absent	absent	absent	absent	2020-08-01	2020-08-31	2021-05-06	Symptomatics	Not mentioned	absent	present	absent	present	absent	present	absent	absent	14	present
Nonaka 2021_1	Ref [36]	SARS-CoV-2 variant of concern P.1 (Gamma) infection in young and middle-aged patients admitted to the intensive care units of a single hospital in Salvador, Northeast Brazil, February 2021	0	Prevalence Study	absent	absent	present	absent	absent	absent	absent	absent	absent	absent	absent	absent	present	absent	absent	absent	absent	absent	absent	absent	absent	absent	absent	absent	absent	absent	absent	absent	absent	absent	2020-05-01	2021-02-28	2021-08-04	Symptomatics & assymptomatics	Not mentioned	absent	present	present	present	absent	absent	absent	present	12	absent
Nonaka 2021_2	Ref [106]	Genomic Evidence of SARS-CoV-2 Reinfection Involving E484K Spike Mutation, Brazil	0	Case Report	present	present	present	absent	absent	absent	absent	absent	absent	absent	absent	absent	present	absent	absent	absent	absent	absent	absent	absent	absent	absent	absent	absent	absent	absent	absent	absent	absent	absent	2020-05-26	2020-10-26	2021-02-19	Symptomatics	Not mentioned	absent	present	present	present	absent	absent	absent	present	2	present
Oliveira 2021	Ref [50]	Re-emergence of Gamma-like-II and emergence of Gamma-S:E661D SARS-CoV-2 lineages in the south of Brazil after the 2021 outbreak	0	Prevalence Study	present	present	absent	absent	absent	absent	absent	absent	absent	absent	absent	absent	absent	absent	absent	absent	absent	present	absent	absent	absent	absent	absent	absent	absent	absent	absent	absent	absent	absent	2020-03-01	2021-04-30	2021-11-17	Symptomatics	Not mentioned	absent	absent	absent	absent	absent	absent	present	absent	86	absent
Oliveira 2022	Ref [63]	Active surveillance and early detection of community transmission of SARS-CoV-2 Mu variant (B.1.621) in the Brazilian Amazon	0	Prevalence Study	absent	present	absent	absent	absent	absent	absent	absent	present	absent	absent	absent	absent	absent	absent	absent	absent	absent	absent	absent	absent	absent	absent	absent	absent	absent	absent	absent	absent	absent	2021-04-01	2021-06-30	2022-03-02	Not mentioned	Travel hist. absent	absent	present	present	present	absent	absent	present	absent	757	absent
Oliveira 2022_2	Ref [84]	Genomic surveillance: Circulating lineages and genomic variation of SARS-CoV-2 in early pandemic in Ceara state, Northeast Brazil	1	Prevalence Study	present	absent	absent	absent	absent	absent	absent	absent	absent	absent	absent	absent	absent	absent	present	absent	absent	absent	absent	absent	absent	absent	absent	absent	absent	absent	absent	absent	absent	absent	2020-07-01	2021-06-30	2022-08-31	Not mentioned	Not mentioned	absent	absent	present	absent	absent	absent	present	absent	34	absent
Padilha 2022	Ref [85]	Emergence of Two Distinct SARS-CoV-2 Gamma Variants and the Rapid Spread of P.1-like-II SARS-CoV-2 during the Second Wave of COVID-19 in Santa Catarina, Southern Brazil	1	Prevalence Study	present	present	present	absent	absent	absent	absent	absent	absent	absent	absent	absent	absent	absent	absent	present	absent	absent	absent	absent	absent	absent	absent	absent	absent	absent	absent	absent	absent	absent	2020-03-01	2021-04-30	2022-03-27	Not mentioned	Not mentioned	absent	present	absent	absent	absent	absent	present	absent	203	absent
Paiva 2020	Ref [21]	Multiple Introductions Followed by Ongoing Community Spread of SARS-CoV-2 at One of the Largest Metropolitan Areas of Northeast Brazil	0	Prevalence Study	present	present	absent	absent	absent	absent	absent	present	absent	absent	absent	absent	absent	absent	absent	absent	absent	absent	absent	absent	absent	absent	absent	absent	absent	absent	absent	absent	absent	absent	2020-04-06	2020-05-14	2020-12-09	Not mentioned	Not mentioned	absent	present	absent	absent	absent	absent	present	absent	101	present
Penetra 2022	Ref [115]	Post-acute COVID-19 syndrome after reinfection and vaccine breakthrough by the SARS-CoV-2 Gamma variant in Brazil	0	Case Report	present	present	absent	absent	present	absent	absent	absent	absent	absent	absent	absent	absent	absent	absent	absent	absent	absent	absent	absent	absent	absent	absent	absent	absent	absent	absent	absent	absent	absent	2020-04-08	2021-04-30	2021-10-22	Symptomatics	Not mentioned	absent	present	absent	absent	absent	absent	absent	absent	2	absent
Pereira 2021	Ref [116]	Genomic surveillance activities unveil the introduction of the SARS-CoV-2 B.1.525 variant of interest in Brazil: Case report	0	Case Report	present	present	absent	absent	absent	absent	absent	absent	absent	absent	absent	absent	present	absent	absent	absent	absent	absent	absent	absent	absent	absent	absent	absent	absent	absent	absent	absent	absent	absent	2021-02-10	2021-02-10	2021-05-11	Symptomatics	Travel hist. present	absent	present	present	present	absent	absent	absent	present	1	present
Prado 2021	Ref [43]	Wastewater-based epidemiology as a useful tool to track SARS-CoV-2 and support public health policies at municipal level in Brazil	0	Prevalence Study	absent	present	absent	absent	present	absent	absent	absent	absent	absent	absent	absent	absent	absent	absent	absent	absent	absent	absent	absent	absent	absent	absent	absent	absent	absent	absent	absent	absent	absent	2020-04-01	2020-08-31	2021-01-05	Not mentioned	Not mentioned	present	absent	present	absent	absent	absent	present	absent	4	present
Resende 2021_1	Ref [76]	Evolutionary Dynamics and Dissemination Pattern of the SARS-CoV-2 Lineage B.1.1.33 During the Early Pandemic Phase in Brazil	0	Prevalence Study	present	present	absent	absent	present	absent	absent	present	absent	present	absent	absent	present	present	absent	present	present	present	present	absent	present	absent	present	absent	absent	present	present	absent	absent	absent	2020-02-29	2020-04-30	2021-02-17	Symptomatics & assymptomatics	Not mentioned	absent	present	absent	absent	absent	absent	present	present	190	present
Resende 2021_2	Ref [24]	A Potential SARS-CoV-2 Variant of Interest (VOI) Harboring Mutation E484K in the Spike Protein Was Identified within Lineage B.1.1.33 Circulating in Brazil	0	Prevalence Study	present	present	absent	absent	absent	absent	absent	absent	absent	absent	absent	absent	absent	absent	absent	absent	absent	absent	absent	absent	absent	absent	absent	absent	absent	absent	absent	absent	absent	absent	2020-03-12	2021-01-27	2021-04-21	Not mentioned	Not mentioned	absent	absent	absent	absent	absent	absent	absent	absent	422	absent
Resende 2021_3	Ref [105]	Severe Acute Respiratory Syndrome Coronavirus 2 P.2 Lineage Associated with Reinfection Case, Brazil, June October 2020	0	Case Report	present	present	absent	absent	absent	absent	absent	absent	absent	absent	absent	present	absent	absent	absent	absent	absent	absent	absent	absent	absent	absent	absent	absent	absent	absent	absent	absent	absent	absent	2020-06-01	2020-10-31	2021-04-21	Symptomatics	Not mentioned	absent	present	present	absent	absent	present	absent	absent	2	absent
Resende 2021_4	Ref [39]	The ongoing evolution of variants of concern and interest of SARS-CoV-2 in Brazil revealed by convergent indels in the amino (N)-terminal domain of the spike protein	0	Prevalence Study	present	present	absent	present	present	present	present	absent	absent	present	present	absent	present	present	absent	present	absent	present	absent	absent	present	absent	absent	absent	absent	absent	absent	absent	absent	absent	2020-03-12	2020-06-28	2021-08-14	Not mentioned	Patients with and without travel hist.	absent	absent	absent	absent	absent	absent	present	absent	45	absent
Romano 2021	Ref [109]	SARS-CoV-2 reinfection caused by the P.1 lineage in Araraquara city, Sao Paulo State, Brazil	0	Case Report	present	absent	absent	absent	absent	absent	present	absent	absent	absent	absent	absent	absent	absent	absent	absent	absent	absent	absent	absent	absent	absent	absent	absent	absent	absent	absent	absent	absent	absent	2020-09-29	2021-02-04	2021-04-06	Symptomatics	Not mentioned	absent	absent	absent	absent	absent	present	absent	absent	2	present
Romano 2022	Ref [86]	Early Emergence and Dispersal of Delta SARS-CoV-2 Lineage AY.99.2 in Brazil	1	Prevalence Study	present	absent	present	present	present	absent	present	present	absent	absent	present	absent	present	absent	present	present	absent	present	absent	present	present	present	absent	present	absent	absent	absent	absent	absent	absent	2021-04-01	2021-12-31	2022-06-17	Symptomatics & assymptomatics	Patients with and without travel hist.	absent	absent	absent	absent	absent	absent	absent	present	9181	absent
Salles 2022	Ref [57]	Genomic surveillance of SARS-CoV-2 Spike gene by sanger sequencing	0	Prevalence Study	present	present	absent	absent	present	absent	absent	absent	absent	absent	absent	absent	absent	absent	absent	absent	absent	absent	absent	absent	absent	absent	absent	absent	absent	absent	absent	absent	absent	absent	NA	NA	2022-01-20	Symptomatics	Not mentioned	absent	present	absent	present	absent	absent	absent	present	3	absent
SantAnna 2021	Ref [34]	Emergence of the novel SARS-CoV-2 lineage VUI-NP13L and massive spread of P.2 in South Brazil	0	Prevalence Study	present	present	absent	absent	absent	absent	absent	absent	absent	absent	present	absent	absent	absent	absent	absent	absent	absent	absent	absent	absent	absent	absent	absent	absent	absent	absent	absent	absent	absent	2020-04-24	2020-11-30	2021-07-15	Not mentioned	Not mentioned	absent	absent	present	absent	absent	absent	present	absent	340	present
Silva 2022	Ref [59]	Seroprevalence, Prevalence, and Genomic Surveillance: Monitoring the Initial Phases of the SARS-CoV-2 Pandemic in Betim, Brazil	0	Prevalence Study	present	present	present	present	absent	absent	absent	absent	absent	absent	absent	absent	absent	absent	absent	absent	absent	absent	absent	absent	absent	absent	absent	absent	absent	absent	absent	absent	absent	absent	2020-06-03	2020-07-15	2022-02-07	Symptomatics & assymptomatics	Patients with and without travel hist.	absent	absent	present	absent	absent	absent	present	absent	35	present
Silva 2022_2	Ref [67]	Delta Variant of SARS-CoV-2 Replacement in Brazil: A National Epidemiologic Surveillance Program	1	Prevalence Study	present	absent	present	present	present	present	present	absent	present	absent	present	absent	present	absent	present	absent	present	absent	present	present	absent	absent	absent	present	absent	absent	present	absent	present	present	2021-04-20	2021-10-31	2022-04-20	Symptomatics	Not mentioned	absent	absent	present	present	present	absent	present	absent	7549	present
Siqueira 2021	Ref [65]	SARS-CoV-2 genomic analyses in cancer patients reveal elevated intrahost genetic diversity	0	Prevalence Study	present	present	absent	absent	present	absent	absent	absent	absent	absent	absent	absent	absent	absent	absent	absent	absent	absent	absent	absent	absent	absent	absent	absent	absent	absent	absent	absent	absent	absent	2020-04-07	2020-05-05	2021-02-16	Not mentioned	Not mentioned	absent	absent	present	absent	absent	absent	present	absent	71	present
Siqueira 2021	Ref [118]	Distinguishing SARS-CoV-2 bonafide re-infection from pre-existing minor variant reactivation	0	Case Report	present	present	absent	absent	present	absent	absent	absent	absent	absent	absent	absent	absent	absent	absent	absent	absent	absent	absent	absent	absent	absent	absent	absent	absent	absent	absent	absent	absent	absent	2020-05-04	2020-08-16	2021-02-14	Symptomatics	Not mentioned	absent	absent	present	absent	absent	absent	present	absent	1	absent
Slavov 2021_1	Ref [33]	Genomic monitoring unveil the early detection of the SARS-CoV-2 B.1.351 (beta) variant (20H/501Y.V2) in Brazil	0	Prevalence Study	present	present	absent	absent	absent	absent	present	absent	absent	absent	absent	absent	absent	absent	absent	absent	absent	absent	absent	absent	absent	absent	absent	absent	absent	absent	absent	absent	absent	absent	NA	2021-03-31	2021-07-06	Not mentioned	Not mentioned	absent	present	present	present	absent	present	absent	absent	210	absent
Slavov 2021_2	Ref [31]	Molecular surveillance of the on-going SARS-COV-2 epidemic in Ribeirao Preto City, Brazil	0	Prevalence Study	present	present	absent	absent	absent	absent	present	absent	absent	absent	absent	absent	absent	absent	absent	absent	absent	absent	absent	absent	absent	absent	absent	absent	absent	absent	absent	absent	absent	absent	2020-03-01	2020-12-31	2021-06-24	Not mentioned	Not mentioned	absent	absent	absent	absent	absent	present	absent	absent	29	absent
Slavov 2021_3	Ref [52]	Genomic monitoring of the SARS-CoV-2 B1.1.7 (WHO VOC Alpha) in the Sao Paulo state, Brazil	0	Prevalence Study	present	present	present	absent	absent	absent	present	absent	absent	absent	absent	absent	absent	absent	absent	absent	absent	absent	absent	absent	absent	absent	absent	absent	absent	absent	absent	absent	absent	absent	2021-02-01	2021-08-31	2021-11-27	Not mentioned	Not mentioned	absent	absent	absent	absent	absent	absent	present	absent	366	absent
Tort 2021	Ref [96]	SARS-CoV-2 variant N.9 identified in Rio de Janeiro, Brazil	0	Case Report	present	present	absent	absent	present	absent	absent	absent	absent	absent	absent	absent	absent	absent	absent	absent	absent	absent	absent	absent	absent	absent	absent	absent	absent	absent	absent	absent	absent	absent	2020-12-09	2020-12-09	2021-09-24	Symptomatics	Travel hist. absent	absent	absent	present	absent	absent	absent	absent	present	1	absent
Tosta 2021	Ref [35]	Short Report: Early genomic detection of SARS-CoV-2 P.1 variant in Northeast Brazil	0	Prevalence Study	present	present	absent	absent	absent	absent	absent	absent	absent	absent	absent	absent	present	absent	absent	absent	absent	absent	absent	absent	absent	absent	absent	absent	absent	absent	absent	absent	absent	absent	2021-01-01	2021-01-01	2021-07-19	Not mentioned	Travel hist. present	absent	present	present	present	absent	absent	absent	present	11	present
Varela 2021	Ref [51]	SARS-CoV-2 introduction and lineage dynamics across three epidemic peaks in Southern Brazil: massive spread of P.1	0	Prevalence Study	present	present	absent	absent	absent	absent	absent	absent	absent	absent	present	absent	absent	absent	absent	absent	absent	absent	absent	absent	absent	absent	absent	absent	absent	absent	absent	absent	absent	absent	2020-08-10	2021-03-01	2021-11-17	Not mentioned	Not mentioned	absent	present	present	present	absent	absent	present	absent	75	present
Viala 2022	Ref [88]	The Divergent Pattern of SARS-CoV-2 Variant Predominance and Transmission Dynamics in the Brazilian Island of Ilhabela	1	Prevalence Study	present	present	absent	absent	absent	absent	present	absent	absent	absent	absent	absent	absent	absent	absent	absent	absent	absent	absent	absent	absent	absent	absent	absent	absent	absent	absent	absent	absent	absent	2021-05-01	2021-10-31	2022-07-05	Symptomatics	Not mentioned	absent	present	present	present	absent	absent	present	absent	2986	absent
Voloch 2021	Ref [25]	Genomic Characterization of a Novel SARS-CoV-2 Lineage from Rio de Janeiro, Brazil	0	Prevalence Study	present	present	absent	absent	present	absent	absent	absent	absent	absent	absent	absent	absent	absent	absent	absent	absent	absent	absent	absent	absent	absent	absent	absent	absent	absent	absent	absent	absent	absent	2020-04-01	2020-11-30	2021-04-26	Not mentioned	Not mentioned	absent	absent	absent	absent	absent	absent	absent	absent	180	present
Volpato 2021	Ref [124]	Early detection of the SARS-CoV-2 P.1 variant in Rio Grande do Sul, Brazil: a case report	0	Case Report	present	present	present	absent	absent	absent	absent	absent	absent	absent	present	absent	absent	absent	absent	absent	absent	absent	absent	absent	absent	absent	absent	absent	absent	absent	absent	absent	absent	absent	2020-11-29	2020-11-29	2021-08-27	Symptomatics	Travel hist. absent	absent	absent	present	absent	absent	absent	present	absent	1	present
Wink 2021	Ref [95]	First identification of SARS-CoV-2 lambda (C.37) variant in Southern Brazil	0	Case Report	present	present	present	absent	absent	absent	absent	absent	absent	absent	present	absent	absent	absent	absent	absent	absent	absent	absent	absent	absent	absent	absent	absent	absent	absent	absent	absent	absent	absent	NA	NA	2021-09-02	Symptomatics	Travel hist. present	absent	absent	present	absent	absent	absent	present	absent	1	present
Wink 2022	Ref [60]	Genomic Surveillance of SARS-CoV-2 Lineages Indicates Early Circulation of P.1 (Gamma) Variant of Concern in Southern Brazil	0	Prevalence Study	present	present	present	absent	absent	absent	absent	absent	absent	absent	present	absent	absent	absent	absent	absent	absent	absent	absent	absent	absent	absent	absent	absent	absent	absent	absent	absent	absent	absent	2020-03-01	2021-05-31	2022-02-16	Symptomatics	Not mentioned	absent	absent	present	absent	absent	absent	present	absent	200	present
Xavier 2020	Ref [32]	The ongoing COVID-19 epidemic in Minas Gerais, Brazil: insights from epidemiological data and SARS-CoV-2 whole genome sequencing	0	Prevalence Study	present	present	absent	present	absent	absent	absent	absent	absent	absent	absent	absent	absent	absent	absent	absent	absent	absent	absent	absent	absent	absent	absent	absent	absent	absent	absent	absent	absent	absent	2020-03-04	2020-03-26	2020-08-11	Not mentioned	Not mentioned	absent	present	absent	present	absent	present	absent	absent	40	present
Yu 2021	Ref [119]	SARS-CoV-2 reinfection: report of two cases in Southeast Brazil	0	Case Report	absent	present	absent	absent	absent	absent	present	absent	absent	absent	absent	absent	absent	absent	absent	absent	absent	absent	absent	absent	absent	absent	absent	absent	absent	absent	absent	absent	absent	absent	2020-07-29	2021-02-04	2021-05-25	Symptomatics	Not mentioned	absent	absent	present	absent	absent	absent	absent	present	4	absent
Zavascki 2022	Ref [89]	Evaluation of Clinical Course of Gamma (P.1) Variant of Concern versus Lineages in Hospitalized Patients with COVID-19 in a Reference Center in Brazil	1	Prevalence Study	present	absent	present	absent	absent	absent	absent	absent	absent	absent	present	absent	absent	absent	absent	absent	absent	absent	absent	absent	absent	absent	absent	absent	absent	absent	absent	absent	absent	absent	2020-06-01	2021-05-31	2022-06-27	Symptomatics	Not mentioned	absent	absent	present	absent	absent	absent	present	absent	86	absent
Zimerman 2022	Ref [68]	Comparative Genomics and Characterization of SARS-CoV-2 P.1 (Gamma) Variant of Concern From Amazonas, Brazil	1	Prevalence Study	present	present	present	absent	absent	present	absent	absent	absent	absent	absent	absent	absent	absent	absent	absent	absent	absent	absent	absent	absent	absent	absent	absent	absent	absent	absent	absent	absent	absent	2021-02-18	2021-03-10	2022-02-15	Symptomatics	Not mentioned	absent	present	absent	present	absent	absent	present	absent	44	present
[truncated: 17 more columns]

## Sheet: TableS2
Table S2: Amount of samples in the 106 articles versus sequences included in the GISAID platform from 2020 to 2022.
Year	Samples in the articles	GISAID sequences (October 19, 2022)	Ratio
2020	571	1826	3.1979
2021	7655	90545	11.8282
2022	41183	91994	2.23379
Total	49409	184365	3.73141

## Sheet: TableS3
Table S3: Absolute frequencies of all the lineages reported in the 106 selected studies
Lineage	Absolute frequency
P.1	35398
B.1.617.2 + AY	15780
P.2	1983
B.1.1.28	1321
B.1.1.7	1296
B.1.1.33	1152
B	489
B.1.617	419
B.1.1	353
B.1.1.529	319
B.1	216
P.4	197
P.1.2	169
N.9	127
P.1.7	82
P.1-like2	71
B.1.195	54
B.1.1.161	49
P.1.12	46
B.1.1.378	38
P.1.1	29
P.7	26
B.1.1.332	22
B.1.91	20
N.10	20
N.10	17
C.37	12
B.1.1.143	9
A	8
B.1.1.314	8
B.1.566	6
B.1.1.29	5
B.1.1.77	5
B.1.1.119	5
B.1.212	5
N.1	5
B.1.1.162	4
B.1.621	3
B.1.351	3
B.1.1.519	3
B.1.1.393	3
B.1.177.52	3
B.1.234	3
B.1.212	3
A.2	2
B.1.5	2
B.2.2	2
B.1.2	2
B.1.525	2
B.1.1.34	2
B.1.1.306	2
B.1.1.187	2
B.1.1.318	2
C.14	2
B.1.1.371	2
C.36	2
B.1.28	2
B.1.3	1
B.1.80	1
B.1.143	1
B.1.170	1
B.1.332	1
B.1.407	1
B.1.544	1
B.1.1.44	1
B.1.1.49	1
B.1.1.106	1
B.1.1.251	1
B.1.1.277	1
B.2.1	1
B.6	1
B.1.177	1
A.1	1
B.1.1.274	1
B.1.1.58	1
B.1.1.94	1
B.1.206	1
B.3	1
B.6.7	1
B.1.1.348	1
B.1.1.372	1
B.1.1.374	1
B.1.1.391	1
B.1.1.97	1
B.1.160.25	1
B.1.177.32	1
B.1.221	1
B.1.240	1
B.1.258	1
B.1.499	1
B.1.617.1	1
N.4	1
P.1.10	1
B.1.1.370	1
B.1.1.409	1
B.1.1.462	1

## Sheet: TableS4
Table S4: Descriptional panel of nine variables concerning the 106 studies included grouped by study type
Variable	Levels	Total	Case reports	Prevalence studies
Authorship	Public Universities	91	27	64
	Public Laboratories	86	27	59
	Private Institutions	45	11	34
Symptomatology	Not mentioned	44	7	37
	Symptomatic	46	24	22
	Asymptomatic	2	1	1
	Both	14	0	14
Travel history	Not mentioned	84	20	64
	With	7	4	3
	Without	5	4	1
	With and without	10	4	6
Sample	Sewage	2	0	2
	Human	104	33	71
Target	E	48	15	33
	N	62	20	42
	Orf1ab	37	9	28
	S	7	3	4
Sequencing platform	MinION	17	4	13
	MiSeq	56	11	45
	Other	31	14	17
Described sequecing metrics	Described	50	14	36
	Absent	56	18	38
Variant calling	Pangolin	75	20	55
	IQTREE	59	17	42
	NextClade	29	10	19
	PhyML	5	3	2
	Other	5	1	4
Phylogeny	Maximum likelihood	79	21	58
	Other	5	4	1

## Sheet: TableS5
Table S5: Studies included in Figure 3. The number of citations was retrieved on October 19, 2022
document	citations	links	Article DOI	Reference
faria (2021)	433	49	10.1126/science.abh2644	Ref [22]
candido (2020)	182	38	10.1126/science.abd2161	Ref [20]
voloch (2021)	161	26	10.1128/jvi.00119-21	Ref [25]
nonaka (2021b)	95	12	10.3201/eid2705.210191	Ref [106]
naveca (2021)	88	36	10.1038/s41591-021-01378-7	Ref [28]
francisco (2021)	46	11	10.1016/j.virusres.2021.198345	Ref [87]
adrielle dos santos (2021)	41	2	10.1016/j.jinf.2021.01.020	Ref [117]
claro (2021)	32	8	10.3201/eid2703.210038	Ref [123]
fongaro (2021)	29	1	10.1016/j.scitotenv.2021.146198	Ref [91]
araujo (2020)	28	2	10.1590/0074-02760200342	Ref [4]
resende (2020)	28	20	10.3389/fmicb.2020.615280	Ref [76]
paiva (2020)	25	9	10.3390/v12121414	Ref [21]
martins (2021)	24	10	10.2807/1560-7917.es.2021.26.12.2100276	Ref [92]
xavier (2020)	21	8	10.1080/22221751.2020.1803146	Ref [32]
nascimento (2020)	19	11	10.1590/0074-02760200310	Ref [94]
resende (2021b)	18	8	10.3201/eid2707.210401	Ref [105]
resende (2021c)	18	11	10.3390/v13050724	Ref [24]
romano (2021)	15	4	10.1590/s1678-9946202163036	Ref [109]
siqueira (2021b)	13	4	10.1093/ve/veab013	Ref [65]
silva (2021)	12	15	10.1590/s1678-9946202163058	Ref [121]
wink (2021)	11	1	10.1017/ice.2021.390	Ref [95]
slavov (2021a)	10	5	10.1002/jmv.27190	Ref [33]
de siqueira (2021)	10	7	10.1016/j.ijid.2021.05.010	Ref [111]
resende (2021a)	10	15	10.1093/ve/veab069	Ref [39]
fintelman-rodrigues (2021)	9	4	10.3201/eid2705.204912	Ref [108]
estofolete (2021)	9	2	10.3390/v13071237	Ref [122]
goes (2021)	8	3	10.1016/j.meegid.2021.104998	Ref [113]
lamarca (2021)	8	17	10.1371/journal.pntd.0009835	Ref [46]
amorim (2021)	8	4	10.3201/eid2706.210558	Ref [110]
nonaka (2021a)	7	8	10.1016/j.ijid.2021.08.003	Ref [36]
franceschi (2021a)	7	10	10.1186/s12864-021-07708-w	Ref [27]
tosta (2021)	6	9	10.1371/journal.pntd.0009591	Ref [35]
mir (2021)	6	5	10.3389/fmicb.2021.653986	Ref [30]
moreira (2021b)	6	12	10.3390/v13060984	Ref [29]
da silva (2021)	5	1	10.1016/j.bjid.2021.101588	Ref [112]
dos santos (2021b)	5	4	10.1093/jtm/taab066	Ref [23]
adamoski (2021)	5	4	10.3201/eid2712.211326	Ref [40]
fonseca (2021)	4	3	10.1016/j.jinf.2021.05.014	Ref [120]
franceschi (2021b)	4	10	10.3390/pathogens10080988	Ref [37]
slavov (2021b)	3	5	10.1016/j.meegid.2021.104976	Ref [31]
sant'anna (2021)	3	11	10.1080/22221751.2021.1949948	Ref [34]
yu (2021)	3	3	10.1590/s1678-9946202163050	Ref [119]
francisco junior (2021)	3	9	10.3390/v13102013	Ref [44]
demoliner (2021)	2	5	10.1016/j.meegid.2021.105134	Ref [49]
botelho-souza (2021)	2	3	10.1038/s41598-021-83203-2	Ref [54]
dos santos (2021a)	2	3	10.1093/jtm/taab033	Ref [107]
gräf (2021)	2	4	10.1093/ve/veab091	Ref [56]
lamarca (2022b)	2	5	10.1128/jvi.01228-21	Ref [101]
naveca (2022)	2	6	10.1128/spectrum.02366-21	Ref [61]
campos (2021)	2	1	10.26633/rpsp.2021.126	Ref [38]
de souza (2021)	2	4	10.3390/v13112127	Ref [47]
kashima (2022)	1	4	10.1002/jmv.27389	Ref [45]
varela (2021)	1	11	10.1016/j.meegid.2021.105144	Ref [51]
volpato (2021)	1	6	10.1017/ice.2021.387	Ref [124]
arantes (2021)	1	2	10.1093/jtm/taab153	Ref [98]
moreira (2021a)	1	11	10.1093/ve/veab087	Ref [42]
oliveira (2021)	1	4	10.1186/s12985-021-01690-1	Ref [50]
da silva (2022b)	1	1	10.3201/eid2801.211817	Ref [53]
oliveira (2022a)	0	2	10.1002/jmv.27686	Ref [63]
gularte (2021)	0	7	10.1007/s42770-021-00621-0	Ref [97]
gularte (2022a)	0	4	10.1007/s42770-022-00789-z	Ref [103]
ferreira (2022a)	0	2	10.1016/j.biologicals.2022.08.001	Ref [77]
penetra (2022)	0	1	10.1016/j.ijid.2021.10.048	Ref [115]
gräf (2022)	0	12	10.1016/j.isci.2022.104156	Ref [82]
ferreira (2022b)	0	3	10.1016/j.micinf.2022.104949	Ref [100]
soares da silva (2022)	0	1	10.1016/j.tmaid.2022.102390	Ref [73]
slavov (2022)	0	4	10.1016/j.virusres.2021.198643	Ref [52]
gularte (2022b)	0	7	10.1016/j.virusres.2022.198702	Ref [58]
da silva (2022a)	0	2	10.1016/j.virusres.2022.198907	Ref [74]
oliveira (2022b)	0	7	10.1016/j.virusres.2022.198908	Ref [84]
dorlass (2021)	0	4	10.1016/j.ygeno.2021.10.015	Ref [48]
giovanetti (2022)	0	7	10.1038/s41564-022-01191-z	Ref [81]
banho (2022)	0	5	10.1038/s43856-022-00108-5	Ref [72]
fonseca (2022)	0	14	10.1093/ve/veac064	Ref [78]
dezordi (2022)	0	5	10.1099/mgen.0.000751	Ref [75]
wink (2022)	0	6	10.1128/spectrum.01511-21	Ref [60]
freire-neto (2022)	0	3	10.1371/journal.pntd.0010337	Ref [79]
salles (2022)	0	2	10.1371/journal.pone.0262170	Ref [57]
tort (2021)	0	6	10.1590/0074-02760210166	Ref [96]
cunha (2021)	0	4	10.3389/fmed.2021.760170	Ref [99]
zimerman (2022)	0	2	10.3389/fmed.2022.806611	Ref [68]
fernandez (2022)	0	1	10.3389/fmed.2022.839389	Ref [102]
kuriyama (2022)	0	6	10.3389/fmed.2022.862284	Ref [64]
gesto (2022)	0	3	10.3389/fmed.2022.910176	Ref [80]
romano (2022)	0	2	10.3389/fmed.2022.930380	Ref [86]
henriques-santos (2021)	0	9	10.3389/fmicb.2021.757783	Ref [66]
silva (2022a)	0	5	10.3389/fmicb.2022.799713	Ref [59]
bittar (2021)	0	2	10.3389/fpubh.2021.745310	Ref [41]
miguita (2022)	0	1	10.3389/froh.2022.871107	Ref [90]
de souza (2022)	0	7	10.3390/v14040659	Ref [69]
padilha (2022)	0	8	10.3390/v14040695	Ref [85]
adamoski (2022)	0	2	10.3390/v14040809	Ref [70]
silva (2022b)	0	7	10.3390/v14050847	Ref [67]
viala (2022)	0	4	10.3390/v14071481	Ref [88]
zavascki (2022)	0	2	10.4269/ajtmh.21-1264	Ref [89]

## Sheet: TableS6
Table S6: Authors included in Figure 4. The number of citations was retrieved on October 19, 2022
Author	Articles	Citations	total link strength
Paola Resende	19	237	200
Marilda Siqueira	17	196	199
Tiago Gräf	14	286	159
Felipe Naveca	14	160	158
Fernando Spilki	13	77	110
Marta Giovanetti	12	151	223
Gonzalo Bello	12	197	172
Luiz Alcantara	11	56	220
Luciana Appolinario	10	83	154
Gabriel Wallau	10	173	153
Edson Delatorre	10	167	153
Nuno Faria	10	682	86
Mauricio Nogueira	9	192	198
Vagner Fonseca	9	151	130
Ana Tereza Vasconcelos	9	402	97
Luiz De Almeida	9	402	97
Renato Aguiar	9	717	95
Alana Hansen	9	67	95
Juliana Gularte	9	67	95
Juliane Fleck	9	67	95
Matheus Weber	9	67	95
Meriane Demoliner	9	67	95
Paula Almeida	9	67	95
Ester Sabino	9	676	59
Cecilia Banho	8	10	178
Lívia Sacchetto	8	10	178
Ana Carolina Mendonça	8	83	139
Alexandra Gerber	8	402	92
Ana Paula Guimarães	8	402	92
Micheli Filippi	8	60	89
Dimas Covas	7	14	197
Simone Kashima	7	14	197
Svetoslav Slavov	7	14	197
Irina Riediger	7	77	145
Maria Debur	7	77	145
Renata Lopes	7	31	120
Ronaldo Francisco	7	402	80
Fágner Heldt	7	60	80
Filipe Moreira	7	189	79
Ighor Arantes	7	113	63
Antonio Martins	6	11	187
Claudia Barros	6	11	187
Elaine Marqueze	6	11	187
Maria Elias	6	11	187
Sandra Sampaio	6	11	187
Vincent Viala	6	11	187
Elaine Santos	6	14	170
Evandra Rodrigues	6	14	170
Anna Carolina Paixao	6	77	113
Sandra Fernandes	6	58	108
Fernando Motta	6	112	101
Filipe Dezordi	6	125	96
Cristiano Da Costa	6	138	93
Tatiana Gregianini	6	28	91
Andréa Cavalcanti	6	25	81
Renan Souza	6	188	76
Mariana Da Silva	6	14	65
Vyctoria Pereira	6	14	65
Cliomar Do Santos	6	104	63
Darlan Cândido	6	662	61
Amilcar Tanuri	6	349	61
Ingra Claro	6	659	50
Jaqueline De Jesus	6	666	49
Afonso Barth	6	37	42
Andreza Martins	6	37	42
Elisangela Mattos	5	1	168
Heidge Fukumasu	5	1	168
Jayme Souza-Neto	5	1	168
Jessika Lesbon	5	1	168
Loyze De Lima	5	1	168
Luiz Coutinho	5	1	168
Mirele Poleti	5	1	168
Patricia Assato	5	1	168
Raquel Cassano	5	1	168
Rejane Grotto	5	1	168
Ricardo Brassaloti	5	1	168
Debora Moretti	5	10	154
Raul Neto	5	10	154
Rafael Bezerra	5	14	139
Rodrigo Calado	5	14	139
Alice Rocha	5	49	100
Tirza Mattos	5	120	99
Felicidade Pereira	5	27	96
Victor De Souza	5	102	95
Valdinete Nascimento	5	121	80
Talita Adelino	5	28	80
Fábio Miyajima	5	20	71
Rennan Moreira	5	188	67
José Lourenço	5	42	65
Tulio De Oliveira	5	42	65
Carolina Voloch	5	350	56
Daniel Queiroz	5	6	56
Alessandra Lamarca	5	59	52
William De Souza	5	640	46
Leandro De Souza	5	438	44
Otávio Brustolini	5	174	44
Alexandre Zavascki	5	36	29
Fabiana Volpato	5	36	29
Francielle Monteiro	5	36	29
Priscila Wink	5	36	29
Pilar Mariani	4	1	141
José Patané	4	11	129
João Kitajima	4	11	129
Felipe Da Costa	4	1	126
Marília Moraes	4	0	111
Anderson Leite	4	48	87
Darcita Rovaris	4	12	72
Felipe Iani	4	25	70
Elisa Pereira	4	3	64
Richard Salvato	4	4	61
Alessandro Ferreira	4	621	55
Luciana Gonçalves	4	111	55
Francini Pereira	4	60	52
Larissa Mallmann	4	60	52
Aline De Lima	4	439	50
Danielle Zauli	4	439	50
Frederico Malta	4	439	50
Joice Silva	4	439	50
Claudio Sacchi	4	31	48
Diego Menezes	4	6	47
Rafael De Souza	4	6	47
Paula Fonseca	4	0	43
José Proença-Modena	4	625	42
Leticia Martins	4	8	41
Claudia Mello	4	166	38
José Levi	4	214	25
Julia Willig	4	12	24

## Sheet: TableS7
Table S7: Organizations included in Figure 5. The number of citations was retrieved on October 19, 2022
Organization name	Name in the figure	Articles	Citations
Instituto Butanta	butanta	7	39
Coordenação Geral de Laboratórios de Saúde Pública/ Secretaria de Vigilância em Saúde/ Ministério de Saúde	cglab/svs/ms	8	81
Centro de Informações Estratégicas em Vigilância em Saúde/RS	cievs/rs	4	8
DASA	dasa	3	182
DB Diagnóstocoss	db diagnósticos	3	615
Escola Superior de Agricultura "Luiz de Queiroz"	esalq	5	1
Faculdade de Medicina de São José do Rio Preto	famerp	8	10
Universidade Feevale	feevale	12	69
Fiocruz Ceará	fiocruz ceará	5	20
Fiocruz Pernambuco - Instituto Aggeu Magalhães	fiocruz iam	10	173
Fiocruz Instituto Carlos Chagas	fiocruz icc	5	1
Fiocruz Instituto Evandro Chagas	fiocruz iec	4	32
Fiocruz Instituto Gonçalo Moniz	fiocruz igm	13	191
Fiocruz Amazônia Instituto Leônidas e Maria Deane	fiocruz ilmd	11	122
Fiocruz Instituto Oswaldo Cruz	fiocruz ioc	30	291
Faculdade de Medicina de Ribeirão Preto/ Universidade de São Paulo	fmrp/usp	12	685
Universidade Franciscana	franciscana	4	12
Fundação Ezequiel Dias	funed	5	28
Fundação de Vigilância em Saúde/ AM	fvs/am	6	139
Hospital Moinhos de Vento	h. moinhos de vento	3	4
Hospital de Clínicas de Porto Alegre	hcpa	6	37
Instituto Hermes Pardini	hermes pardini	5	621
Instituto Adolfo Lutz	ial	8	467
Instituto D'Or	idor	4	23
Imperial College London	imperial college	8	683
Instituto Nacional do Câncer	inca	3	26
Kwazulu-Natal Research Innovation and Sequencing Platform	krisp	7	55
Laboratório Central de Saúde Pública/ AL	lacen/al	4	58
Laboratório Central de Saúde Pública/AM	lacen/am	5	120
Laboratório Central de Saúde Pública/ BA	lacen/ba	6	55
Laboratório Central de Saúde Pública/ ES	lacen/es	4	48
Laboratório Central de Saúde Pública/ MG	lacen/mg	4	34
Laboratório Central de Saúde Pública/ PR	lacen/pr	6	59
Laboratório Central de Saúde Pública/ RJ	lacen/rj	6	25
Laboratório Central de Saúde Pública/ RS	lacen/rs	5	27
Laboratório Central de Saúde Pública/ SC	lacen/sc	6	58
Laboratório Central de Saúde Pública/ SE	lacen/se	6	104
Laboratório Nacional de Computação Científica	lncc	9	402
Mendelics	mendelics	4	11
ngs soluções genômicas	ngs sg	4	1
National Institute of Allergy and Infectious Diseases	niaid	3	26
Oxford University	oxford u	12	684
Serviço Nacional de Aprendizagem Industrial/ RJ	senai/rj	3	0
Secretaria Estadual de Saúde/ RJ	ses/rj	4	166
Serviço Social da Indústria/RJ	sesi/rj	3	0
Secretaria Municipal de Saúde do Rio de Janeiro	sms/rio de janeiro	3	5
Universidade Estadual de Santa Cruz	uesc	3	59
Universidade Federal da Bahia	ufba	3	61
Universidade Federal de Ciências da Saúde de Porto Alegre	ufcspa	6	15
Universidade Federal do Espírito Santo	ufes	10	167
Universidade Federal de Minas Gerais	ufmg	21	725
Universidade Federal do Mato Grosso do Sul	ufms	3	28
Universidade Federal do Paraná	ufpr	3	1
Universidade Federal do Rio Grande do Sul	ufrgs	9	47
Universidade Federal do Rio de Janeiro	ufrj	12	355
Universidade Federal do Sergipe	ufs	3	48
Universidade Federal de Uberlândia	ufu	3	615
Universidade Estadual Paulista Botucatu	unesp botucatu	8	10
Universidade Estadual Paulista São José do Rio Preto	unesp são josé do rio preto	3	9
Universidade Estadual de Campinas	unicamp	4	617
Universidade de La República	univ. de la república	3	34
University of Texas	univ. texas	4	11
Universidade de São Paulo	usp	23	690

## Sheet: TableS8
Table S8: Top 30 articles cited in the 106 articles included in the systematic review
Artoc;e	Type	Citations among included articles
faria nr et al. (2021). genomics and epidemiology of the p.1 sars-cov-2 lineage in manaus, brazil. science	genomic surveillance	41
rambaut a et al. (2020). a dynamic nomenclature proposal for sars-cov-2 lineages to assist genomic epidemiology. nat microbiol	methodological	40
candido ds et al. (2020). evolution and epidemic spread of sars-cov-2 in brazil. science	genomic surveillance	37
naveca fg et al. (2021). covid-19 in amazonas, brazil, was driven by the persistence of endemic lineages and p.1 emergence. nat med	genomic surveillance	36
katoh k et al. (2013). mafft multiple sequence alignment software version 7: improvements in performance and usability. mol biol evol	methodological	31
nguyen lt et al. (2014). iq-tree: a fast and effective stochastic algorithm for estimating maximum-likelihood phylogenies. mol biol evol	methodological	31
minh bq et al. (2020). iq-tree 2: new models and efficient methods for phylogenetic inference in the genomic era. mol biol evol	methodological	27
voloch cm et al. (2021). genomic characterization of a novel sars-cov-2 lineage from rio de janeiro, brazil. j virol	genomic surveillance	25
kalyaanamoorthy s et al. (2017). modelfinder: fast model selection for accurate phylogenetic estimates. nat methods	methodological	23
suchard ma et al. (2018). bayesian phylogenetic and phylodynamic data integration using beast 1.10. virus evol	methodological	22
li h et al. (2009). the sequence alignment/map format and samtools. bioinformatics	methodological	20
rambaut a et al. (2016). exploring the temporal structure of heterochronous sequences using tempest (formerly path-o-gen). virus evol	methodological	20
shu y et al. (2017). gisaid: global initiative on sharing all influenza data - from vision to reality. euro surveill	methodological	19
corman vm et al. (2020). detection of 2019 novel coronavirus (2019-ncov) by real-time rt-pcr. euro surveill	methodological	18
tegally h et al. (2021). detection of a sars-cov-2 variant of concern in south africa. nature	genomic surveillance	18
hadfield j et al. (2018). nextstrain: real-time tracking of pathogen evolution. bioinformatics	methodological	17
rambaut a et al. (2018). posterior summarization in bayesian phylogenetics using tracer 1.7. syst biol	methodological	17
resende pc et al. (2020). evolutionary dynamics and dissemination pattern of the sars-cov-2 lineage b.1.1.33 during the early pandemic phase in brazil. front microbiol	genomic surveillance	17
fujino t et al. (2021). novel sars-cov-2 variant in travelers from brazil to japan. emerg infect dis	genomic surveillance	16
sabino ec et al. (2021). resurgence of covid-19 in manaus, brazil, despite high seroprevalence. lancet	epidemiology	16
zhu n et al. (2020). a novel coronavirus from patients with pneumonia in china, 2019. n engl j med	epidemiology	16
bolger am et al. (2014). trimmomatic: a flexible trimmer for illumina sequence data. bioinformatics	methodological	15
sagulenko p et al. (2018). treetime: maximum-likelihood phylodynamic analysis. virus evol	methodological	15
larsson a (2014). aliview: a fast and lightweight alignment viewer and editor for large datasets. bioinformatics	methodological	13
korber b et al. (2020). tracking changes in sars-cov-2 spike: evidence that d614g increases infectivity of the covid-19 virus. cell	genomic surveillance	12
lemey p et al. (2009). bayesian phylogeography finds its roots. plos comput biol	methodological	12
li h et al. (2009). fast and accurate short read alignment with burrows-wheeler transform. bioinformatics	methodological	12
nonaka ckv et al. (2021). genomic evidence of sars-cov-2 reinfection involving e484k spike mutation, brazil. emerg infect dis	genomic surveillance	12
o'toole a et al. (2021). assignment of epidemiological lineages in an emerging pandemic using the pangolin tool. virus evol	methodological	12
zhou p et al. (2020). a pneumonia outbreak associated with a new coronavirus of probable bat origin. nature	epidemiology	12
